# Supplementary material for: Targeting protein disulfide isomerase with the flavonoid isoquercetin to improve hypercoagulability in advanced cancer
Source: JCI journal article supplement (doi:10.1172/jci.insight.125851), 2019-01-17
Supplement: sd1 [file 1]

### **Supplemental Acknowledgements**

Frederick Rickles - Veterans Affairs Medical Center, Washington, DC

Heinz Lenz - Jane Anne Nohl Division of Hematology, University of Southern California, Los Angeles, CA

Jorge Nieva - Jane Anne Nohl Division of Hematology, University of Southern California, Los Angeles, CA

Alexander Fuld - White River Junction Veterans Affairs Medical Center, White River Junction, VT

Anita Rodrigues - Division of Hematology-Oncology, Beth Israel Deaconess Medical Center, Harvard Medical School, Boston, MA

Andrea Bullock - Division of Hematology-Oncology, Beth Israel Deaconess Medical Center, Harvard Medical School, Boston, MA

Bruno Bockorny - Division of Hematology-Oncology, Beth Israel Deaconess Medical Center, Harvard Medical School, Boston, MA

Mary Linton Peters - Division of Hematology-Oncology, Beth Israel Deaconess Medical Center, Harvard Medical School, Boston, MA

Jessica Zerillo- Division of Hematology-Oncology, Beth Israel Deaconess Medical Center, Harvard Medical School, Boston, MA

Diane Saverese - Division of Hematology-Oncology, Beth Israel Deaconess Medical Center, Harvard Medical School, Boston, MA
